# Supplementary material for: Allogeneic NK cells induce monocyte-to-dendritic cell conversion, control tumor growth, and trigger a pro-inflammatory shift in patient-derived cultures of primary and metastatic colorectal cancer
Source: PubMed Central journal article supplement — J Immunother Cancer. 2023 Dec 6;11(12):e007554. doi: 10.1136/jitc-2023-007554 (PMC10711876; doi:10.1136/jitc-2023-007554), 2023-12-06
Supplement: jitc-2023-007554supp001.pdf [file jitc-2023-007554supp001.pdf]

**Table S1:** Catalogue numbers and clones of used antibodies.

| Antibodies | Fluorochrome | Brand          | Catalog number | Clone       |
|------------|--------------|----------------|----------------|-------------|
| 7AAD       |              | Sigma          | A9400-1MG      |             |
| BDCA-3     | BV711        | BD Biosciences | 563155         | 1A4         |
| CD103      | BV711        | Biologend      | 334334         | 5C3         |
| CD11c      | APC-Cy7      | Biologend      | 337218         | Bu15        |
| CD14       | FITC         | BD Biosciences | 345784         | MΦP9        |
| CD16       | BV786        | BD Biosciences | 563690         | 3G8         |
| CD1c       | PE-Cy7       | Sony           | 2257580        | L161        |
| CD25       | APC          | BD Biosciences | 340907         | 2A3         |
| CD25       | FITC         | BD Biosciences | 345796         | 2A3         |
| CD3        | BV711        | BD Biosciences | 563725         | UCHT1       |
| CD3        | PerCP-Cy5.5  | BD Biosciences | 332771         | SK7         |
| CD4        | AF700        | BD Biosciences | 557922         | RPA-T4      |
| CD45       | AF700        | Biologend      | 304024         | HI30        |
| CD45       | PE-Cy7       | BD Biosciences | 557748         | HI30        |
| CD45RA     | APC-H7       | BD Biosciences | 560674         | HI100       |
| CD56       | BV510        | BD Biosciences | 563041         | NCAM16.2    |
| CD69       | FITC         | BD Biosciences | 347823         | L78         |
| CD8        | V500         | BD Biosciences | 561618         | SK1         |
| CD80       | BV650        | BD Biosciences | 564158         | L307.4      |
| CD83       | PE-CF594     | BD Biosciences | 562631         | HB15e       |
| CD86       | PE           | BD Biosciences | 555658         | 2331(FUN-1) |
| CD88       | BV711        | BD Biosciences | 742319         | D53-1473    |
| CD89       | BV421        | BD Biosciences | 744374         | A59         |
| CTLA-4     | PE-CF594     | BD Biosciences | 562742         | BNI3        |
| DNAM1      | AF700        | RnD Systems    | FAB666N        | 102511      |
| Epcam      | BV421        | BD Biosciences | 563180         | EBA-1       |

|            |           |                  |             |           |
|------------|-----------|------------------|-------------|-----------|
| Epcam      | FITC      | Biologend        | 324204      | 9C4       |
| FoxP3      | PE        | eBioscience      | 12-4776-42  | PCH101    |
| HLA-ABC    | PE        | ThermoFisher     | MA1-19662   | W6/32     |
| HLA-DR     | APC       | BD Biosciences   | 340907      | 2A3       |
| HLA-E      | PE        | eBioscience      | 12-9953-42  | 3D12HLA-E |
| HLA-G      | PE        | Biologend        | 335906      | 87G       |
| KIR2D      | FITC      | Miltenyi Biotech | 130-098-689 | NKVFS1    |
| Lag3       | PE-Cy7    | eBioscience      | 25-2239-42  | 3DS223H   |
| MICA/B     | PE        | Biologend        | 320906      | 6D4       |
| Nectin-2   | PE        | Biologend        | 337409      | TX31      |
| NKG2A      | PE-Vio770 | Miltenyi Biotech | 130-114-093 | REA110    |
| NKG2C      | PE        | Miltenyi Biotech | 130-119-776 | REA205    |
| NKG2D      | APC       | BD Biosciences   | 558071      | 1D11      |
| NKp30      | PE        | Biologend        | 325208      | P30-15    |
| NKp44      | PE-Vio770 | Miltenyi Biotech | 130-120-356 | REA1163   |
| NKp46      | APC       | Miltenyi Biotech | 130-092-609 | 9E2       |
| PD-1       | BV786     | BD Biosciences   | 563789      | EH12.1    |
| PD-L1      | BV786     | BD Biosciences   | 563739      | MIH1      |
| PVR        | PE        | Biologend        | 337610      | SK11.4    |
| Tim3       | BV421     | Biologend        | 345008      | F38-2E2   |
| ULBP 1     | PE        | R&D systems      | FAB1380P    | 170818    |
| ULBP 2/5/6 | PE        | R&D systems      | FAB1298P    | 165903    |
| ULBP 3     | PE        | R&D systems      | FAB1517P    | 166510    |

**Table S2:** Changes in NK cell receptor expression after 5 days upon co-culture of dissociated primary colorectal cancer samples in the presence and absence of sample and/or R848. NK cell:SCS ratio: 1:1. NK baseline is receptor expression of NK cells before co-culture. Abbreviations: T = tumor. R = R848. NK = NK cells

| Marker  | N | Conditions - Mean (SEM) |              |             |               | Analysis type | p-value | Multiple Comparison Analysis |                  |                     |         |           |               |
|---------|---|-------------------------|--------------|-------------|---------------|---------------|---------|------------------------------|------------------|---------------------|---------|-----------|---------------|
|         |   | NK baseline             | NK           | T + NK      | T + NK + R848 |               |         | NKbaseline-NK                | NKbaseline -T+NK | NKbaseline - T+NK+R | NK-T+NK | NK-T+NK+R | T+NK - T+NK+R |
| %KIR2D  | 5 | 9.6 (2.0)               | 8.8 (1.6)    | 10.3 (1.6)  | 11.5 (1.5)    | Friedman      | ns      | ns                           | ns               | ns                  | ns      | ns        | ns            |
| %NKG2A  | 5 | 56.6 (4.3)              | 64.3 (5.5)   | 66.2 (5.6)  | 68.5 (6.2)    | ANOVA         | **      | ns                           | *                | **                  | ns      | ns        | ns            |
| %NKG2C  | 5 | 7.1 (1.0)               | 20.7 (4.1)   | 24.7 (4.7)  | 25.6 (3.6)    | ANOVA         | **      | *                            | **               | **                  | ns      | ns        | ns            |
| %NKG2D  | 5 | 74.2 (5.0)              | 75.6 (3.8)   | 67.7 (6.2)  | 76.6 (6.7)    | ANOVA         | ns      | ns                           | ns               | ns                  | ns      | ns        | ns            |
| %DNAM-1 | 5 | 68.4 (5.2)              | 78.9 (1.5)   | 78.3 (3.1)  | 79.6 (1.9)    | ANOVA         | ns      | ns                           | ns               | ns                  | ns      | ns        | ns            |
| %CD25   | 5 | 6.0 (1.2)               | 34.0 (8.1)   | 33.9 (8.4)  | 41.5 (11.7)   | ANOVA         | **      | *                            | *                | **                  | ns      | ns        | ns            |
| %NKp30  | 5 | 38.9 (10.7)             | 26.8 (6.9)   | 10.5 (5.4)  | 38.9 (10.7)   | Friedman      | ns      | ns                           | ns               | ns                  | ns      | ns        | ns            |
| %NKp44  | 5 | 44.4 (6.4)              | 48.3 (5.9)   | 28.3 (12.3) | 30.8 (13.6)   | ANOVA         | ns      | ns                           | ns               | ns                  | ns      | ns        | ns            |
| %NKp46  | 5 | 76.1 (1.63)             | 86.2 (0.867) | 85.7 (1.06) | 86.4 (1.21)   | Friedman      | **      | *                            | ns               | ns                  | ns      | ns        | ns            |
| %CD16   | 5 | 2.1 (0.3)               | 3.32 (0.4)   | 0.8 (0.6)   | 1.5 (0.6)     | Friedman      | ns      | ns                           | ns               | ns                  | ns      | ns        | ns            |

**Table S3:** Changes in NK cell receptor expression after 5 days upon co-culture of dissociated metastatic colorectal cancer samples in the presence and absence of sample and/or R848. NK cell:SCS ratio: 1:1. NK baseline is receptor expression of NK cells before co-culture Abbreviations: T = tumor. R = R848. NK = NK cells

| Marker  | N | Conditions - Mean (SEM) |             |             |               | Analysis type | p-value | Multiple Comparison Analysis |                  |                     |         |           |               |
|---------|---|-------------------------|-------------|-------------|---------------|---------------|---------|------------------------------|------------------|---------------------|---------|-----------|---------------|
|         |   | NK baseline             | NK          | T + NK      | T + NK + R848 |               |         | NKbaseline-NK                | NKbaseline -T+NK | NKbaseline - T+NK+R | NK-T+NK | NK-T+NK+R | T+NK - T+NK+R |
| %KIR2D  | 6 | 6.6 (0.7)               | 4.2 (0.6)   | 6.3 (1.3)   | 6.3 (1.1)     | Friedman      | *       | *                            | ns               | ns                  | ns      | ns        | ns            |
| %NKG2A  | 6 | 68.5 (5.2)              | 62.3 (2.2)  | 69.9 (3.6)  | 74.8 (2.6)    | Friedman      | *       | ns                           | ns               | ns                  | ns      | *         | ns            |
| %NKG2C  | 6 | 6.4 (0.9)               | 15.8 (2.7)  | 13.3 (3.2)  | 12.2 (1.8)    | Friedman      | *       | *                            | ns               | ns                  | ns      | ns        | ns            |
| %NKG2D  | 6 | 84.3 (3.3)              | 87.7 (2.0)  | 84.9 (1.7)  | 87.4 (1.2)    | Friedman      | ns      | ns                           | ns               | ns                  | ns      | ns        | ns            |
| %DNAM-1 | 6 | 84.2 (4.4)              | 87.9 (2.4)  | 84.9 (2.2)  | 88 (2.1)      | Friedman      | ns      | ns                           | ns               | ns                  | ns      | ns        | ns            |
| %CD25   | 6 | 2.7 (0.7)               | 19.9 (3.4)  | 19.8 (5.1)  | 25.5 (5.2)    | Friedman      | ****    | ns                           | ns               | ***                 | ns      | ns        | ns            |
| %NKp30  | 6 | 13.2 (6.8)              | 6.0 (1.0)   | 5.6 (0.3)   | 5.3 (1.5)     | Friedman      | ns      | ns                           | ns               | ns                  | ns      | ns        | ns            |
| %NKp44  | 6 | 78.9 (4.0)              | 17.2 (1.2)  | 28.4 (8.9)  | 30.7 (10.2)   | ANOVA         | ****    | ****                         | ***              | ***                 | ns      | ns        | ns            |
| %NKp46  | 6 | 83.7 (1.99)             | 86.3 (1.76) | 87.7 (1.01) | 89.9 (0.920)  | Friedman      | *       | ns                           | ns               | *                   | ns      | ns        | ns            |
| %CD16   | 6 | 12.0 (1.4)              | 6.0 (1.1)   | 10.5 (1.46) | 9.7 (1.2)     | Friedman      | *       | *                            | ns               | ns                  | ns      | ns        | ns            |

**Table S4:** Changes in the myeloid and lymphocyte compartments and in the cytokine and chemokine concentrations upon culture of dissociated primary colorectal cancer samples in the presence and absence of NK cells and/or R848. NK cell:SCS ratio: 1:1. Abbreviations: T = tumor. R = R848. NK = NK cells.

| Marker                           | N | Conditions - Mean (SEM) |               |               |              | Analysis type | p-value | Multiple Comparison Analysis |         |            |            |               |              |
|----------------------------------|---|-------------------------|---------------|---------------|--------------|---------------|---------|------------------------------|---------|------------|------------|---------------|--------------|
|                                  |   | T                       | T+NK          | T+R848        | T+NK+R848    |               |         | T – T+NK                     | T – T+R | T – T+R+NK | T+NK – T+R | T+NK – T+R+NK | T+R – T+R+NK |
| <b>Myeloid Analysis Day 5</b>    |   |                         |               |               |              |               |         |                              |         |            |            |               |              |
| % CD14 neg                       | 9 | 16.9 (3.6)              | 28.3 (5.1)    | 30.8 (4.2)    | 48.2 (5.1)   | ANOVA         | ****    | **                           | ****    | ****       | ns         | ****          | ****         |
| % CD14 dim                       | 9 | 51.1 (7.4)              | 50.8 (5.3)    | 50.3 (5.0)    | 36.3 (4.9)   | ANOVA         | ***     | ns                           | ns      | **         | ns         | **            | **           |
| % CD14 high                      | 9 | 24.0 (6.1)              | 7.6 (2.8)     | 12.0 (3.4)    | 3.9 (1.7)    | ANOVA         | ****    | ***                          | *       | ****       | ns         | ns            | ns           |
| CD14 neg CD80 MFI                | 9 | 19990 (5172)            | 20881 (5143)  | 22298 (5672)  | 32833 (6519) | ANOVA         | ****    | ns                           | ns      | ***        | ns         | ***           | **           |
| CD14 neg CD83 MFI                | 9 | 3691 (434.8)            | 4059 (457.3)  | 4715 (502.2)  | 6176 (692.8) | ANOVA         | ****    | ns                           | ns      | ****       | ns         | ***           | *            |
| CD14 neg CD86 MFI                | 4 | 10214 (3052)            | 10265 (2743)  | 15865 (2113)  | 29587 (4401) | ANOVA         | **      | ns                           | ns      | **         | ns         | **            | *            |
| CD14 neg PD-L1 MFI               | 9 | 2609 (581)              | 2108 (355.5)  | 2186 (388.1)  | 2444 (491.7) | ANOVA         | ns      | ns                           | ns      | ns         | ns         | ns            | ns           |
| CD14 neg Tim3 MFI                | 9 | 9802 (1813)             | 9108 (1687)   | 11231 (2369)  | 11961 (2152) | ANOVA         | ***     | ns                           | ns      | *          | *          | **            | ns           |
| CD14 neg BDCA3 MFI               | 9 | 6897 (1433)             | 5442 (970.9)  | 5944 (1087)   | 6211 (1068)  | ANOVA         | ns      | ns                           | ns      | ns         | ns         | ns            | ns           |
| <b>Lymphocyte Analysis Day 5</b> |   |                         |               |               |              |               |         |                              |         |            |            |               |              |
| Ab. N. CD8+ T cells              | 4 | 238.7 (61.6)            | 232.2 (45.9)  | 213.5 (41.3)  | 196.4 (22.5) | ANOVA         | ns      | ns                           | ns      | ns         | ns         | ns            | ns           |
| Ab. N. CD4+ T helper             | 4 | 679.6 (202.8)           | 601.7 (105.4) | 640.3 (131.1) | 533.4 (26.5) | ANOVA         | ns      | ns                           | ns      | ns         | ns         | ns            | ns           |
| Absolut N aTreg                  | 4 | 111.8 (34.0)            | 50.6 (12.3)   | 67.8 (15.8)   | 34.3 (12.2)  | ANOVA         | **      | *                            | ns      | **         | ns         | ns            | ns           |
| % aTreg                          | 9 | 13.7 (1.8)              | 8.0 (1.3)     | 10.4 (1.7)    | 4.8 (1.1)    | ANOVA         | ****    | **                           | ns      | ****       | ns         | ns            | **           |
| CD8+ T cells %CD25               | 9 | 20.3 (3.5)              | 35.2 (5.2)    | 25.0 (3.6)    | 44.1 (4.9)   | ANOVA         | ****    | **                           | ns      | ****       | ns         | ns            | ***          |
| CD8+ T cells %CD69               | 9 | 26.2 (6.1)              | 31.5 (6.0)    | 34.6 (7.1)    | 43.3 (5.9)   | ANOVA         | ****    | ns                           | *       | ****       | ns         | ***           | *            |
| CD8+ T cells %CTLA4              | 9 | 15.9 (2.5)              | 12.2 (2.8)    | 14.9 (2.6)    | 16.0 (2.9)   | ANOVA         | ns      | ns                           | ns      | ns         | ns         | ns            | ns           |

|                                         |   |              |              |               |               |          |      |    |     |      |      |    |    |
|-----------------------------------------|---|--------------|--------------|---------------|---------------|----------|------|----|-----|------|------|----|----|
| <b>CD8<sup>+</sup> T cells %PD-1</b>    | 9 | 45.3 (7.6)   | 39.7 (7.6)   | 46.5 (7.9)    | 40.1 (8.0)    | ANOVA    | ns   | ns | ns  | ns   | ns   | ns | ns |
| <b>CD8<sup>+</sup> T cells %Tim3</b>    | 9 | 13.6 (4.4)   | 26.0 (7.8)   | 16.7 (4.8)    | 31.9 (8.2)    | Friedman | ***  | ns | ns  | ***  | ns   | ns | ** |
| <b>CD4<sup>+</sup> T helper %CD25</b>   | 9 | 18.6 (2.4)   | 28.7 (4.9)   | 22.3 (2.2)    | 30.9 (4.7)    | ANOVA    | **   | *  | ns  | **   | ns   | ns | ns |
| <b>CD4<sup>+</sup> T helper %CD69</b>   | 9 | 15.3 (2.6)   | 14.0 (3.5)   | 19.6 (3.4)    | 17.5 (3.8)    | Friedman | ***  | ns | *   | ns   | ***  | *  | ns |
| <b>CD4<sup>+</sup> T helper %CTLA4</b>  | 9 | 43.6 (3.7)   | 35.2 (4.2)   | 41.4 (3.7)    | 36.9 (3.6)    | ANOVA    | ns   | ns | ns  | ns   | ns   | ns | ns |
| <b>CD4<sup>+</sup> T helper %Lag3</b>   | 9 | 4.2 (1.4)    | 5.4 (1.5)    | 4.2 (1.1)     | 3.8 (0.6)     | Friedman | ns   | ns | ns  | ns   | ns   | ns | ns |
| <b>CD4<sup>+</sup> T helper %PD-1</b>   | 9 | 31.9 (6.1)   | 31.6 (5.3)   | 37.4 (6.2)    | 30.9 (5.5)    | ANOVA    | *    | ns | ns  | ns   | ns   | ns | ns |
| <b>CD4<sup>+</sup> T helper %Tim3</b>   | 9 | 8.0 (2.6)    | 10.0 (3.6)   | 9.4 (2.5)     | 13.5 (4.7)    | Friedman | ns   | ns | ns  | ns   | ns   | ns | ns |
| <b>Cytokine Analysis Day 5 (pg/mL)</b>  |   |              |              |               |               |          |      |    |     |      |      |    |    |
| <b>IL-12p70</b>                         | 9 | 1.9 (0.6)    | 1.7 (0.5)    | 6.2 (2.4)     | 3.7 (1.7)     | Friedman | ***  | ns | *** | *    | **   | ns | ns |
| <b>IFN<math>\alpha</math></b>           | 9 | 2.6 (0.8)    | 4.6 (2.5)    | 51.7 (25.0)   | 79.7 (34.5)   | Friedman | ***  | ns | ns  | **   | ns   | ** | ns |
| <b>IL-10</b>                            | 9 | 47.3 (10.9)  | 21.2 (5.9)   | 109.1 (16.9)  | 58.1 (9.3)    | Friedman | **** | ns | ns  | ns   | **** | *  | ns |
| <b>IL-6</b>                             | 9 | 38545 (6326) | 21121 (5081) | 42940 (6708)  | 14976 (3200)  | Friedman | **   | ns | ns  | ns   | ns   | ns | *  |
| <b>IL-2</b>                             | 9 | 19.1 (4.0)   | 32.4 (7.6)   | 22.0 (6.8)    | 55.9 (10.5)   | ANOVA    | **   | ns | ns  | **   | ns   | ns | *  |
| <b>IFN<math>\gamma</math></b>           | 9 | 51 (21.12)   | 3495 (2005)  | 358.8 (122.1) | 10342 (1775)  | Friedman | **** | *  | ns  | **** | ns   | ns | *  |
| <b>TNF</b>                              | 9 | 16.3 (5.5)   | 119.1 (62.6) | 54.2 (14.8)   | 120.5 (26.9)  | Friedman | ***  | ns | ns  | ***  | ns   | ns | ns |
| <b>IL-15</b>                            | 9 | 3.2 (1.0)    | 8.1 (4.9)    | 3.8 (1.7)     | 8.2 (4.0)     | Friedman | ns   | ns | ns  | ns   | ns   | ns | ns |
| <b>IL-18</b>                            | 9 | 40.0 (11.4)  | 35.8 (6.09)  | 41.3 (9.0)    | 42.5 (8.5)    | Friedman | ns   | ns | ns  | ns   | ns   | ns | ns |
| <b>Chemokine Analysis Day 5 (pg/mL)</b> |   |              |              |               |               |          |      |    |     |      |      |    |    |
| <b>CCL4</b>                             | 9 | 19.1 (4.5)   | 41.6 (12.2)  | 28.2 (5.8)    | 63.3 (16.4)   | ANOVA    | ***  | ns | ns  | ***  | ns   | ** | ns |
| <b>CCL5</b>                             | 9 | 84.0 (13.5)  | 254.7 (66.1) | 164.9 (38.2)  | 530.1 (137.1) | Friedman | **** | *  | ns  | **** | ns   | ns | *  |

|               |   |                  |                  |                   |                  |          |    |    |    |    |    |    |    |
|---------------|---|------------------|------------------|-------------------|------------------|----------|----|----|----|----|----|----|----|
| <b>CXCL9</b>  | 9 | 124.7<br>(45.3)  | 308.9<br>(147.9) | 189.4 (52.7)      | 302.9<br>(138.4) | Friedman | ns |
| <b>CXCL10</b> | 9 | 650.4<br>(236.9) | 332.0<br>(56.6)  | 1763.4<br>(669.9) | 755.1<br>(156.6) | Friedman | *  | ns | ns | ns | *  | ns | ns |
| <b>CXCL11</b> | 9 | 5.6 (2.3)        | 2.6 (0.7)        | 8.5 (3.9)         | 3.3 (0.6)        | Friedman | *  | ns | ns | ns | ns | ns | ns |
| <b>CCL20</b>  | 9 | 40.7 (11.5)      | 17.6 (6.0)       | 23.4 (5.6)        | 13.0 (6.3)       | Friedman | *  | ns | ns | *  | ns | ns | ns |

**Table S5:** Changes in the myeloid and lymphocyte compartments and in the cytokine and chemokine concentrations upon culture of dissociated metastatic colorectal cancer samples in the presence and absence of NK cells and/or R848. NK cell:SCS ratio: 1:1. Abbreviations: T = tumor. R = R848. NK = NK cells.

| Marker                           | N | Conditions    |               |               |               | Analysis type | p-value | Multiple Comparison Analysis |         |            |            |               |              |
|----------------------------------|---|---------------|---------------|---------------|---------------|---------------|---------|------------------------------|---------|------------|------------|---------------|--------------|
|                                  |   | T             | T+NK          | T+R848        | T+NK+R848     |               |         | T – T+NK                     | T – T+R | T – T+R+NK | T+NK – T+R | T+NK – T+R+NK | T+R – T+R+NK |
| <b>Myeloid Analysis Day 5</b>    |   |               |               |               |               |               |         |                              |         |            |            |               |              |
| % CD14 neg                       | 6 | 7.7 (0.9)     | 21.8 (5.2)    | 17.6 (3.3)    | 27.9 (5.2)    | ANOVA         | ***     | **                           | ns      | ***        | ns         | ns            | ns           |
| % CD14 dim                       | 6 | 17.7 (1.3)    | 47.3 (5.6)    | 35.1 (5.7)    | 37.1 (4.1)    | ANOVA         | **      | ***                          | *       | *          | ns         | ns            | ns           |
| % CD14 high                      | 6 | 74.1 (1.3)    | 29.3 (10.2)   | 46.4 (7.5)    | 33.4 (8.4)    | ANOVA         | ***     | ***                          | *       | **         | ns         | ns            | ns           |
| CD14 neg CD80 MFI                | 6 | 57217 (11402) | 49960 (11464) | 21954 (4030)  | 40163 (16987) | Friedman      | ns      | ns                           | ns      | ns         | ns         | ns            | ns           |
| CD14 neg CD83 MFI                | 6 | 7945 (898.6)  | 7896 (1258)   | 6538 (1117)   | 6239 (1338)   | Friedman      | ns      | ns                           | ns      | ns         | ns         | ns            | ns           |
| CD14 neg CD86 MFI                | 6 | 35604 (21419) | 33465 (21824) | 9900 (1338)   | 16316 (8341)  | Friedman      | ns      | ns                           | ns      | ns         | ns         | ns            | ns           |
| CD14 neg PD-L1 MFI               | 6 | 7119 (668.2)  | 8797 (1570)   | 7429 (1129)   | 5127 (1319)   | Friedman      | ns      | ns                           | ns      | ns         | ns         | ns            | ns           |
| CD14 neg Tim3 MFI                | 6 | 17786 (825.6) | 19517 (1856)  | 16339 (811.7) | 16990 (1911)  | ANOVA         | ns      | ns                           | ns      | ns         | ns         | ns            | ns           |
| CD14 neg BDCA3 MFI               | 6 | 7575 (1666)   | 5809 (1598)   | 4230 (827.8)  | 3398 (674.9)  | ANOVA         | **      | ns                           | ns      | *          | ns         | ns            | ns           |
| <b>Lymphocyte Analysis Day 5</b> |   |               |               |               |               |               |         |                              |         |            |            |               |              |
| Ab. N. CD8 <sup>+</sup> T cells  | 6 | 1028 (174.9)  | 1225 (314.1)  | 1323 (373.5)  | 1211 (387.3)  | ANOVA         | ns      | ns                           | ns      | ns         | ns         | ns            | ns           |
| Ab. N. CD4 <sup>+</sup> T helper | 6 | 1944 (438)    | 2246 (577.4)  | 2467 (894.9)  | 2526 (1206)   | Friedman      | ns      | ns                           | ns      | ns         | ns         | ns            | ns           |
| Absolut N aTreg                  | 6 | 121 (38.3)    | 78.7 (22.9)   | 58.6 (18.3)   | 29.0 (6.3)    | ANOVA         | ns      | ns                           | ns      | *          | ns         | ns            | ns           |
| % aTreg                          | 7 | 5.9 (1.2)     | 2.9 (0.5)     | 3.5 (1.1)     | 1.5 (0.3)     | ANOVA         | **      | *                            | ns      | **         | ns         | ns            | ns           |
| CD8 <sup>+</sup> T cells %CD25   | 7 | 8.8 (2.8)     | 18.8 (3.3)    | 10.0 (2.5)    | 27.4 (5.3)    | ANOVA         | ***     | ns                           | ns      | ***        | ns         | ns            | ***          |
| CD8 <sup>+</sup> T cells %CD69   | 7 | 14.4 (3.9)    | 15.2 (3.1)    | 19.9 (5.5)    | 18.7 (3.1)    | ANOVA         | ns      | ns                           | ns      | ns         | ns         | ns            | ns           |

|                                         |   |                 |               |                |               |          |      |    |     |      |     |     |     |
|-----------------------------------------|---|-----------------|---------------|----------------|---------------|----------|------|----|-----|------|-----|-----|-----|
| <b>CD8<sup>+</sup> T cells %CTLA4</b>   | 7 | 16.1 (2.4)      | 12.3 (3.0)    | 18.7 (3.5)     | 16.5 (3.8)    | ANOVA    | *    | ns | ns  | ns   | *   | ns  | ns  |
| <b>CD8<sup>+</sup> T cells %PD-1</b>    | 7 | 27.0 (8.2)      | 27.3 (8.4)    | 28.0 (8.4)     | 27.9 (7.2)    | ANOVA    | ns   | ns | ns  | ns   | ns  | ns  | ns  |
| <b>CD8<sup>+</sup> T cells %Tim3</b>    | 7 | 5.6 (1.3)       | 10.8 (3.6)    | 9.9 (3.6)      | 11.5 (5.1)    | Friedman | ns   | ns | ns  | ns   | ns  | ns  | ns  |
| <b>CD4<sup>+</sup> T helper %CD25</b>   | 7 | 7.7 (1.1)       | 24.5 (7.1)    | 11.2 (1.9)     | 30.8 (9.0)    | Friedman | ***  | ns | ns  | ***  | ns  | ns  | *   |
| <b>CD4<sup>+</sup> T helper %CD69</b>   | 7 | 16.3 (2.9)      | 16.0 (4.0)    | 17.7 (4.6)     | 16.2 (2.9)    | ANOVA    | ns   | ns | ns  | ns   | ns  | ns  | ns  |
| <b>CD4<sup>+</sup> T helper %CTLA4</b>  | 7 | 40.8 (5.3)      | 30.7 (5.4)    | 42.8 (5.6)     | 35.4 (6.6)    | ANOVA    | ***  | ** | ns  | ns   | *** | ns  | *   |
| <b>CD4<sup>+</sup> T helper %PD-1</b>   | 7 | 31.4 (7.6)      | 30.1 (8.3)    | 28.5 (7.6)     | 26.3 (6.8)    | ANOVA    | ns   | ns | ns  | ns   | ns  | ns  | ns  |
| <b>CD4<sup>+</sup> T helper %Tim3</b>   | 7 | 7.7 (3.2)       | 16.6 (7.5)    | 10.5 (4.6)     | 19.7 (9.3)    | Friedman | ns   | ns | ns  | ns   | ns  | ns  | ns  |
| <b>Cytokine Analysis Day 5 (pg/mL)</b>  |   |                 |               |                |               |          |      |    |     |      |     |     |     |
| <b>IL-12p70</b>                         | 6 | 0.5 (0.005)     | 0.6 (0.04)    | 1.6 (0.1)      | 0.9 (0.1)     | Friedman | **** | ns | *** | ns   | ns  | ns  | ns  |
| <b>IFN<math>\alpha</math></b>           | 6 | 0.5 (0.04)      | 0.8 (0.2)     | 9.1 (4.3)      | 5.05 (2.9)    | Friedman | ***  | ns | *   | *    | ns  | ns  | ns  |
| <b>IL-10</b>                            | 6 | 205 (78.6)      | 36.3 (14.4)   | 1573.2 (413.0) | 609.8 (234.7) | Friedman | **** | ns | ns  | ns   | *** | *   | ns  |
| <b>IL-6</b>                             | 6 | 87230 (12801)   | 10278 (6135)  | 98956 (13835)  | 7887 (2534)   | Friedman | ***  | ns | ns  | *    | ns  | ns  | *   |
| <b>IL-2</b>                             | 6 | 11.23 (2.52)    | 33.38 (4.162) | 29.52 (3.117)  | 59 (3.716)    | ANOVA    | **** | ** | **  | **** | ns  | *** | *** |
| <b>IFN<math>\gamma</math></b>           | 6 | 7.992 (3.748)   | 1834 (636.8)  | 433.9 (145.6)  | 13067 (841.4) | Friedman | **** | *  | ns  | ***  | ns  | ns  | *   |
| <b>TNF</b>                              | 6 | 17.29 (7.94)    | 111.1 (18.87) | 2488 (987.5)   | 1342 (513.4)  | Friedman | **** | ns | *** | *    | ns  | ns  | ns  |
| <b>IL-15</b>                            | 6 | 4.358 (0.04833) | 43 (13.46)    | 5.322 (0.4977) | 43.62 (12.02) | Friedman | **   | *  | ns  | ns   | ns  | ns  | ns  |
| <b>IL-18</b>                            | 6 | 142.9 (40.95)   | 108.3 (44.84) | 296 (105.7)    | 252.4 (96.35) | Friedman | **   | ns | ns  | ns   | *   | *   | ns  |
| <b>Chemokine Analysis Day 5 (pg/mL)</b> |   |                 |               |                |               |          |      |    |     |      |     |     |     |
| <b>CCL4</b>                             | 6 | 12.0 (3.0)      | 31.8 (7.6)    | 93.7 (30.1)    | 82.9 (17.0)   | ANOVA    | **   | ns | *   | *    | ns  | ns  | ns  |

|               |   |               |              |               |               |          |      |    |    |    |    |    |    |
|---------------|---|---------------|--------------|---------------|---------------|----------|------|----|----|----|----|----|----|
| <b>CCL5</b>   | 6 | 47.9 (18.7)   | 133.6 (31.2) | 424.4 (253.6) | 504.6 (163.1) | Friedman | ***  | ns | ns | ** | ns | ns | ns |
| <b>CXCL9</b>  | 6 | 70.1 (35.8)   | 569.5 (90.9) | 384.8 (110.8) | 465 (138.4)   | Friedman | **   | *  | ns | ns | ns | ns | ns |
| <b>CXCL10</b> | 6 | 217.8 (129)   | 1453 (661)   | 2002 (1237)   | 1939 (1171)   | Friedman | *    | ns | *  | ns | ns | ns | ns |
| <b>CXCL11</b> | 6 | 1.2 (0.4)     | 3.2 (0.9)    | 8.4 (5.1)     | 6.3 (3.6)     | Friedman | ns   | ns | ns | ns | ns | ns | ns |
| <b>CCL20</b>  | 6 | 640.5 (347.7) | 89.8 (56.1)  | 1011 (470.5)  | 125 (83.1)    | Friedman | **** | ns | ns | ns | ** | ns | *  |
